# Supplementary material for: Cytokine profile in plasma of severe COVID-19 does not differ from ARDS and sepsis
Source: PubMed Central journal article supplement (PMC7526438; doi:10.1172/jci.insight.140289), 2020-09-03
Supplement: jciinsight-5-140289-s109.pdf [file jciinsight-5-140289-s109.pdf]

## **SUPPLEMENTARY MATERIAL**

### **Cytokine profile in plasma of severe COVID-19 does not differ from ARDS and sepsis**

Jennifer G. Wilson<sup>1\*</sup>, Laura J. Simpson<sup>2\*</sup>, Anne-Maud Ferreira<sup>3\*</sup>, Arjun Rustagi<sup>2</sup>, Jonasel Roque<sup>2</sup>, Adijat Asuni<sup>2</sup>, Thanmayi Ranganath<sup>2</sup>, Philip M. Grant<sup>2</sup>, Aruna Subramanian<sup>2</sup>, Yael Rosenberg-Hasson<sup>4</sup>, Holden T. Maecker<sup>4</sup>, Susan P. Holmes<sup>3</sup>, Joseph E. Levitt<sup>2</sup>, Catherine A. Blish<sup>2,4,5</sup>, Angela J. Rogers<sup>2</sup>

\*These authors share first authorship.

<sup>1</sup>Department of Emergency Medicine, <sup>2</sup>Department of Medicine, and <sup>4</sup>Institute for Immunity, Transplantation, and Infection, Stanford University School of Medicine; <sup>3</sup>Department of Statistics, Stanford University, CA, USA; <sup>5</sup>Chan Zuckerberg Biohub, San Francisco, CA, USA

Corresponding author:  
Angela J. Rogers, MD, MPH  
300 Pasteur Dr A175, Stanford, CA 94305  
650-724-5282  
ajrogerss@stanford.edu

#### **Contents:**

Figure S1. Principal component analysis of 70 additional cytokines in moderate COVID-19, severe COVID-19, ARDS and sepsis.

Figure S2. Differentially expressed cytokines: IL-16, PDGF-BB, and TSLP.

Figure S3. Boxplots for the remaining 67 cytokines measured.

Table S1. Adjusted p-values for comparisons in PDGF-BB, IL-16, and TSLP.

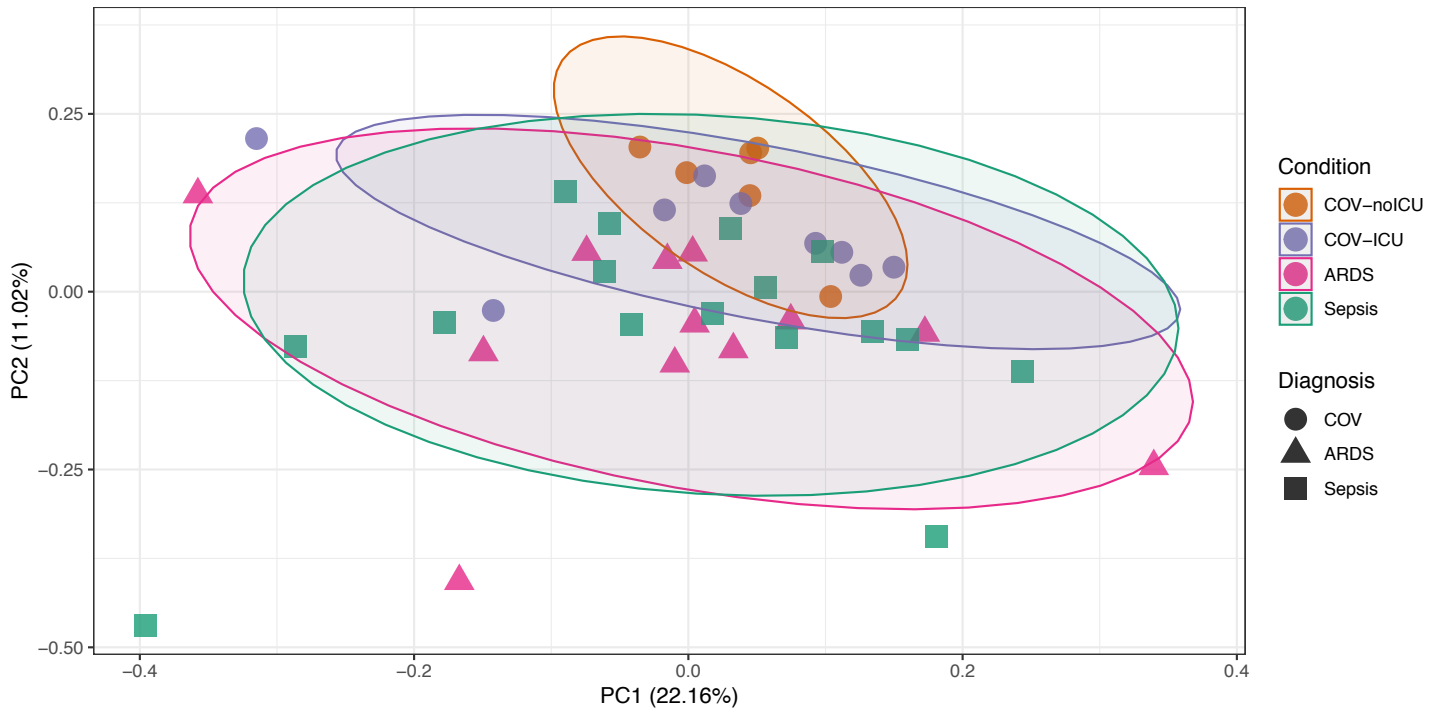

**Supplemental Figure S1.** Principal component analysis (PCA) of 70 additional cytokines in moderate COVID-19, severe COVID-19, ARDS and sepsis. Moderate COVID-19 (COV-noICU, orange),  $n = 6$ . Severe COVID-19 (COV-ICU, purple),  $n = 9$ . ARDS (pink),  $n = 12$ . Sepsis (green),  $n = 16$ . PCA computed by singular value decomposition of the dpMFI values of the 70 cytokines, colored by condition. The first principal component (PC) explains 22.16% of the variability; the second PC explains 11.02% of the variability. The data ellipses were computed assuming a multivariate t-distribution with the ggfortify R package.

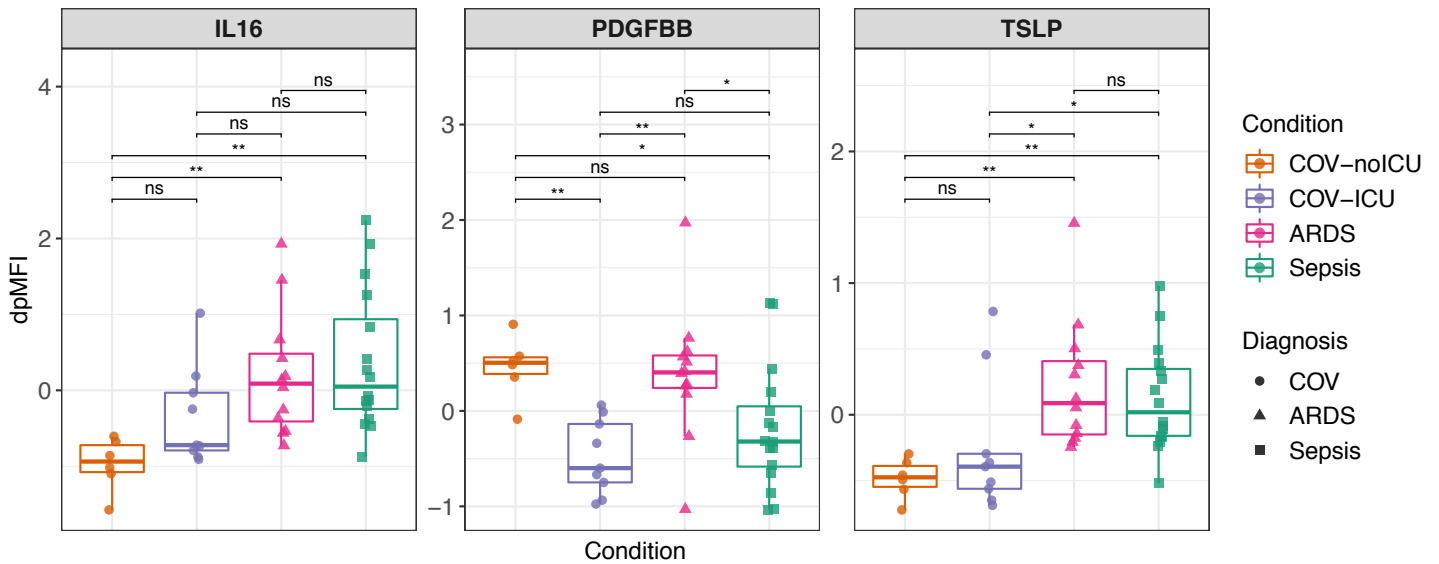

**Supplemental Figure S2.** Differentially expressed cytokines: IL-16, PDGF-BB, and TSLP.

Box plots are shown for IL-16, PDGF-BB, and TSLP, which were the only 3 cytokines that had adjusted p-values < 0.05 by Kruskal-Wallis test with correction for multiple testing with the Benjamini-Hochberg method. Moderate COVID-19 (COV-noICU, orange), n = 6. Severe COVID-19 (COV-ICU, purple), n = 9. ARDS (pink), n = 12. Sepsis (green), n = 16. Adjusted p-values for specific comparisons shown in the plots were calculated by Wilcoxon rank sum tests with correction by the Benjamini-Hochberg correction method. The box plot visualizes the following summary statistics: the middle line represents the median; the lower hinge corresponds to the first quartile (25th); the upper hinge corresponds to the third quartile (75th); upper and lower whiskers extend from the hinge respectively to the largest value and smallest value or no further than 1.5 \* interquartile range; data points beyond the whiskers are outliers.

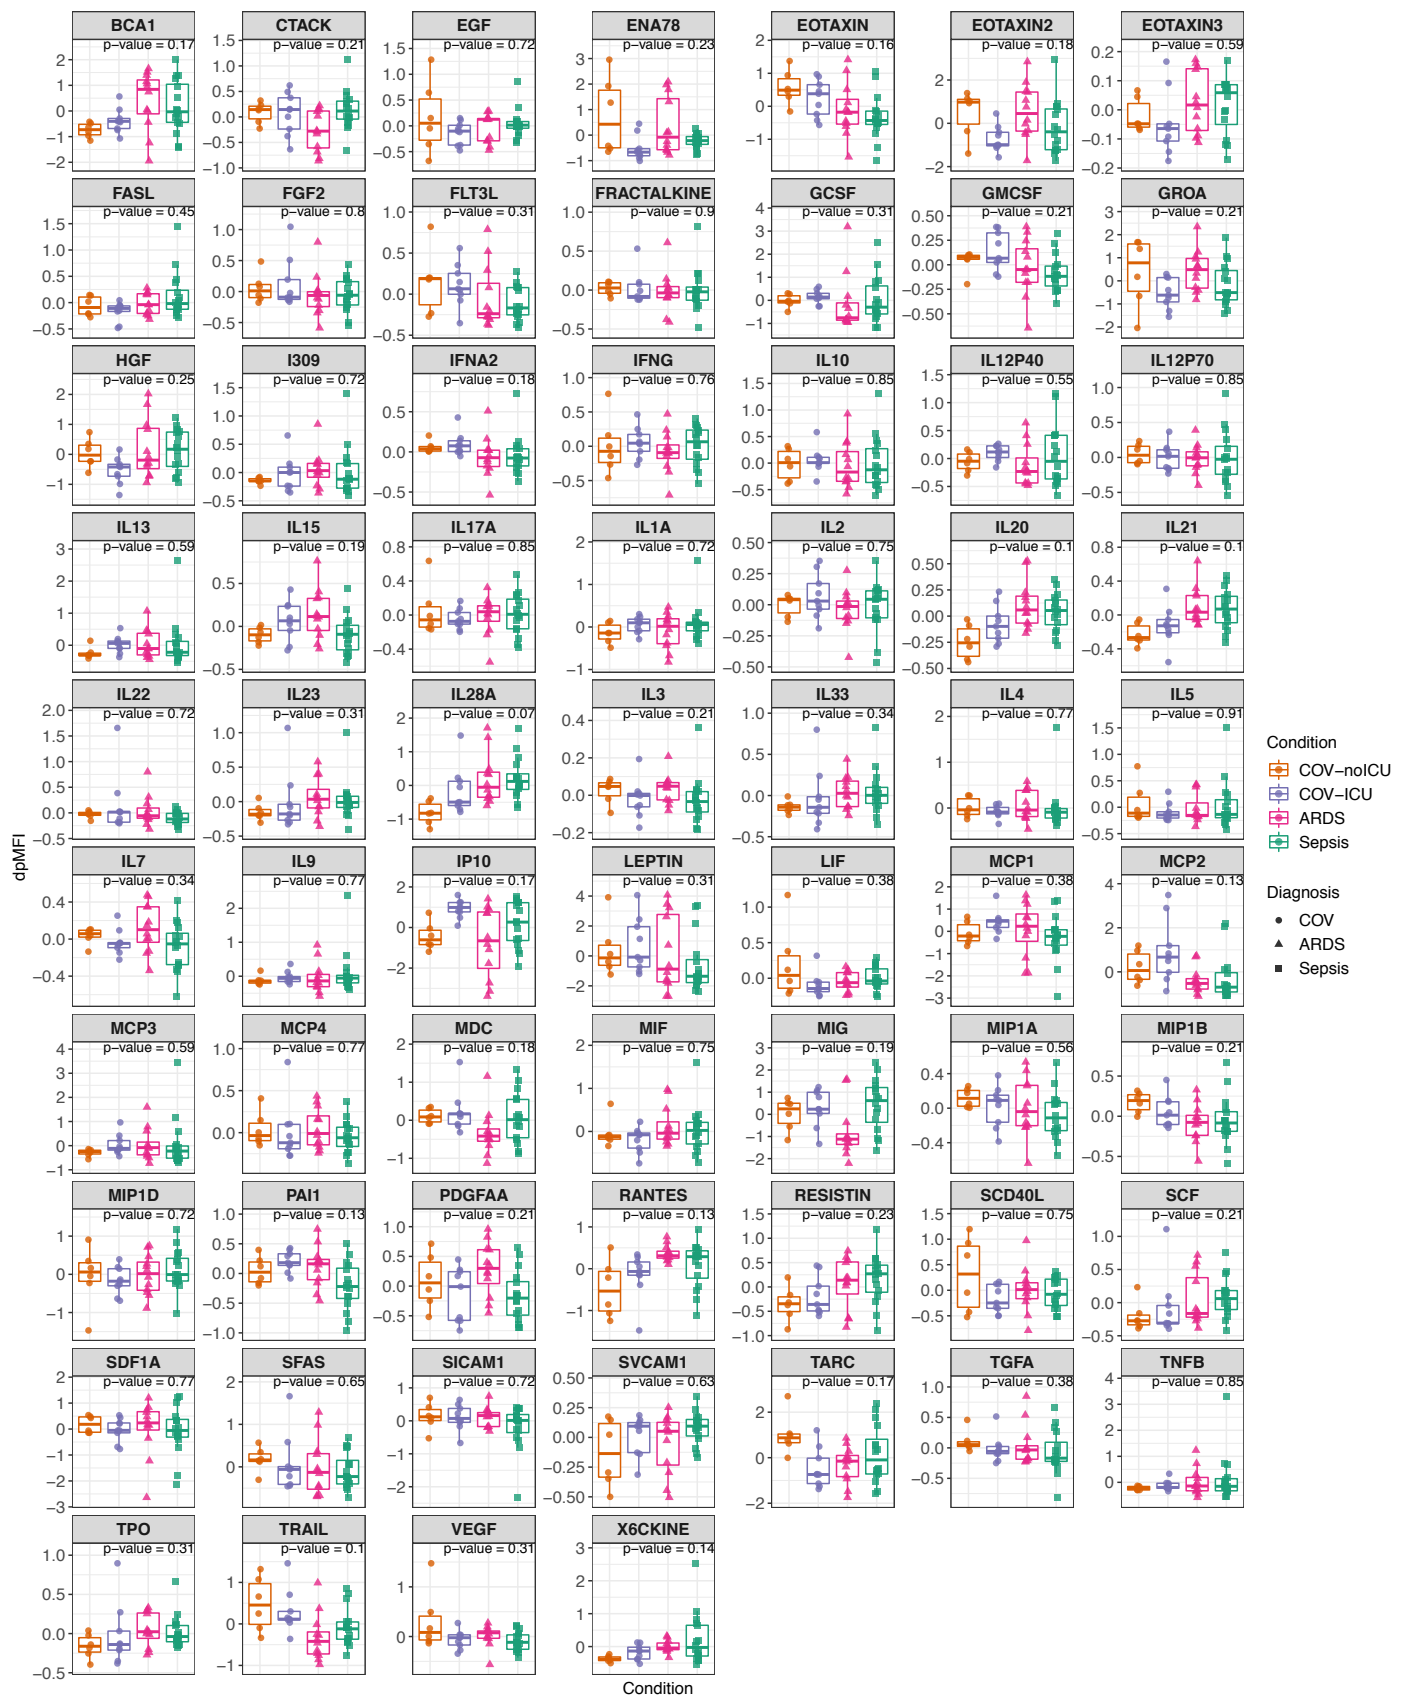

**Supplemental Figure S3.** Boxplots for the remaining 67 cytokines measured.

Moderate COVID-19 (COV-noICU, orange), n = 6. Severe COVID-19 (COV-ICU, purple), n = 9. ARDS (pink), n = 12. Sepsis (green), n = 16. Adjusted p-values (shown in the top right of the plot for each cytokine) were all > 0.05 by Kruskal-Wallis test with correction for multiple testing with the Benjamini-Hochberg method. The box plot visualizes the following summary statistics: the middle line represents the median; the lower hinge corresponds to the first quartile (25th); the upper hinge corresponds to the third quartile (75th); upper and lower whiskers extend from the hinge respectively to the largest value and smallest value or no further than 1.5 \* interquartile range; data points beyond the whiskers are outliers.

| Cytokine | Group 1   | Group 2 | Significance | Adj p-value |
|----------|-----------|---------|--------------|-------------|
| PDGFBB   | COV-noICU | COV-ICU | **           | 0.005       |
| PDGFBB   | COV-noICU | ARDS    | ns           | 0.694       |
| PDGFBB   | COV-noICU | Sepsis  | *            | 0.038       |
| PDGFBB   | COV-ICU   | ARDS    | **           | 0.005       |
| PDGFBB   | COV-ICU   | Sepsis  | ns           | 0.423       |
| PDGFBB   | ARDS      | Sepsis  | *            | 0.039       |
| IL16     | COV-noICU | COV-ICU | ns           | 0.122       |
| IL16     | COV-noICU | ARDS    | **           | 0.002       |
| IL16     | COV-noICU | Sepsis  | **           | 0.002       |
| IL16     | COV-ICU   | ARDS    | ns           | 0.122       |
| IL16     | COV-ICU   | Sepsis  | ns           | 0.070       |
| IL16     | ARDS      | Sepsis  | ns           | 0.703       |
| TSLP     | COV-noICU | COV-ICU | ns           | 0.634       |
| TSLP     | COV-noICU | ARDS    | **           | 0.002       |
| TSLP     | COV-noICU | Sepsis  | **           | 0.002       |
| TSLP     | COV-ICU   | ARDS    | *            | 0.038       |
| TSLP     | COV-ICU   | Sepsis  | *            | 0.042       |
| TSLP     | ARDS      | Sepsis  | ns           | 0.767       |

**Supplemental Table S1.** Adjusted p-values for comparisons in PDGF-BB, IL-16, and TSLP. Moderate COVID-19 (COV-noICU), n = 6. Severe COVID-19 (COV-ICU), n = 9. ARDS, n = 12. Sepsis, n = 16. Adjusted p-values for specific comparisons shown in the plots in Figure S2 were calculated by Wilcoxon rank sum tests with correction by the Benjamini-Hochberg correction method.
